# Supplementary material
Source: Springer Nature journal article supplement (https://www.springermedizin.de/resource/supplementary/12872_2014_779_MOESM2_ESM.pdf/9430490)

52.4%§

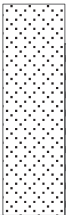

42.6%†\*

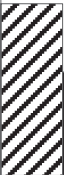

25.7%

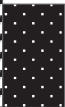

Cohort A (Unmatched)

62.6%‡\*

53.0%§

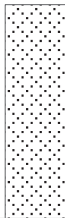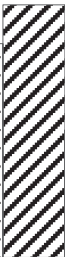

31.6%

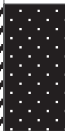

Cohort B (Matched)

□ MT   ▨ MT-PCI   ■ MT-CABG

Supplement: MOESM2 [file 9430490]
